# Supplementary material
Source: PubMed Central journal article supplement (PMC5881802)
Supplement: cwx072_jingetalsupplementaryinfoglycoaug22017a.pdf [file cwx072_jingetalsupplementaryinfoglycoaug22017a.pdf]

**AUG 2**

***Supplementary Information for***

**Synthesis and Characterization of Heparosan-Granulocyte-Colony  
Stimulating Factor Conjugates:  
a natural sugar-based drug delivery system to treat neutropenia**

Wei Jing<sup>1</sup>, Jonathan W. Roberts<sup>1</sup>, Dixy E. Green<sup>2</sup>, Andrew Almond<sup>3</sup>, & Paul L. DeAngelis<sup>2</sup>

<sup>1</sup> Caisson Biotech, LLC, 655 Research Parkway, Suite 525, Oklahoma City, OK 73104

<sup>2</sup> University of Oklahoma Health Sciences Center, Department of Biochemistry and Molecular Biology, University of Oklahoma Health Sciences Center, Oklahoma City, Oklahoma 73126.

<sup>3</sup> School of Chemistry, Manchester Institute of Biotechnology, The University of Manchester, Manchester M1 7DN, UK.

### Supplementary Table

| Treatment<br>Groups | Fold Increase |                         |                         |                       |                       |                         |
|---------------------|---------------|-------------------------|-------------------------|-----------------------|-----------------------|-------------------------|
|                     | WBCs          | Absolute<br>Neutrophils | Absolute<br>Lymphocytes | Absolute<br>Monocytes | Absolute<br>Basophils | Absolute<br>Eosinophils |
|                     | Days 2-3      | Days 2-8                | Days 2-3                | Days 2-6              | Days 2-3              | Days 2-3                |
| 20-kDa PEG-<br>GCSF | +1.6-1.7      | +0.10-7.9               | +0.14-0.29              | +0.17-4.7             | +2.0-2.4              | +1.0-1.1                |
| 55-kDa HEP-<br>GCSF | +1.3-1.4      | +0.07-5.4               | +0.17-0.44              | +0.50-3.8             | +1.5-2.0              | +0.24-1.7               |
| 99-kDa HEP-<br>GCSF | +1.2-1.3      | +0.41-5.7               | +0.16-0.22              | +0.61-4.0             | +1.3-1.7              | +0.53-1.9               |
| Neulasta            | +1.8-2.1      | +0.30-8.9               | +0.32-0.62              | +0.36-5.0             | +2.6-3.7              | +0.61-1.2               |

#### Supplementary Table 1: Summary of hematological changes in rats injected with G-CSF conjugates.

The fold-increase is listed above for various blood cell types at various times post-injection in comparison to the buffer vehicle alone. ( $n = \sim 5/\text{group}$ ; values represents change from concurrent control on the given study period time).

## Supplementary Figures

### Supplementary Figure 1. Structure of Acceptor and HEP derivatives

First, the heparosan polymer was produced by synchronized stoichiometrically controlled polymerization using a heparosan trisaccharide amine-containing glycoside acceptor (**A**) and UDP-GlcA and UDP-GlcNAc with the HEP synthase. This HEP-NH<sub>2</sub> polymer ( $n = \sim 145$  or  $\sim 260$  for the 55- or 99-kDa polymers, respectively) was purified. In the second step, HEP-NH<sub>2</sub> was converted to the aldehyde form via reaction with a heterobifunctional reagent to create HEP-CHO (**B**).

The HEP-CHO and G-CSF were coupled by reductive amination at pH 5 to more selectively react with the amino terminus of the protein (rather than lysine side-chains) yielding the HEP-G-CSF conjugate (**C**). To define the coupling site, the conjugate was first treated with heparin lyase III (cleaves the sugar chain, leaving an unsaturated glucuronic acid derivative at the non-reducing end) and the protein with a 3-sugar unit 'stub' was PAGE purified. Second, the relevant gel slice was excised and treated with the protease trypsin to generate an oligosaccharide-peptide species (**D**) that was identified by liquid chromatography/mass spectrometry (see **Supp. Fig. 5**).

# Supplementary Fig. 1

**A.**

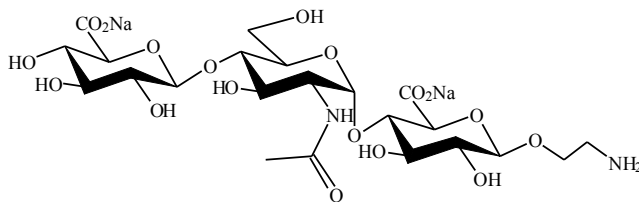

1. PmHS1, UDP-sugars  
2. succinimidyl-*p*-formylbenzonate

**B.**

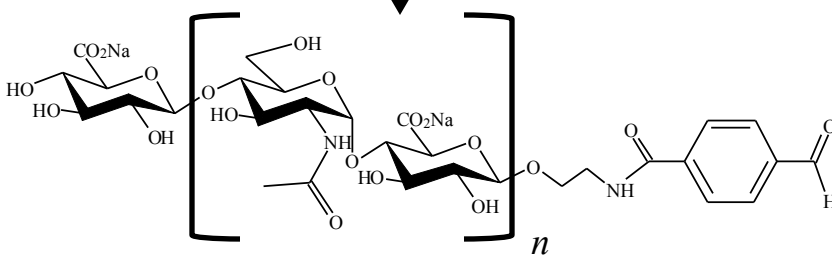

G-CSF,  $\text{NaCNBH}_3$ , pH 5.0

**C.**

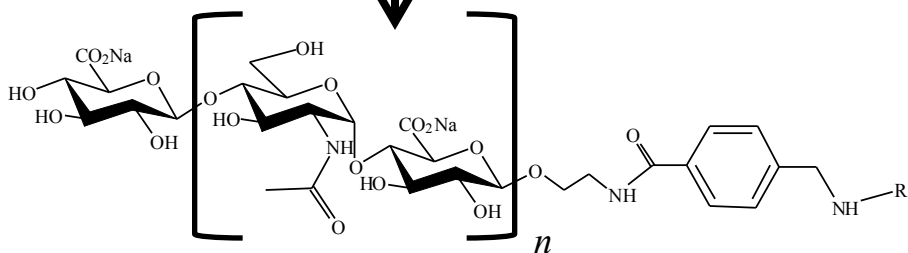

1. Hep lyase III  
2. trypsin

**D.**

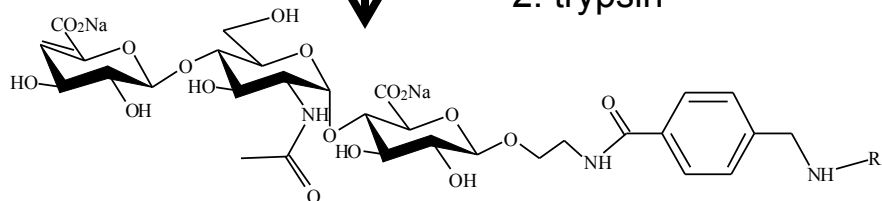

$\text{R}_1 = \text{G-CSF}$   
 $\text{R}_2 = \text{amino-terminal tryptic peptide}$

**a**

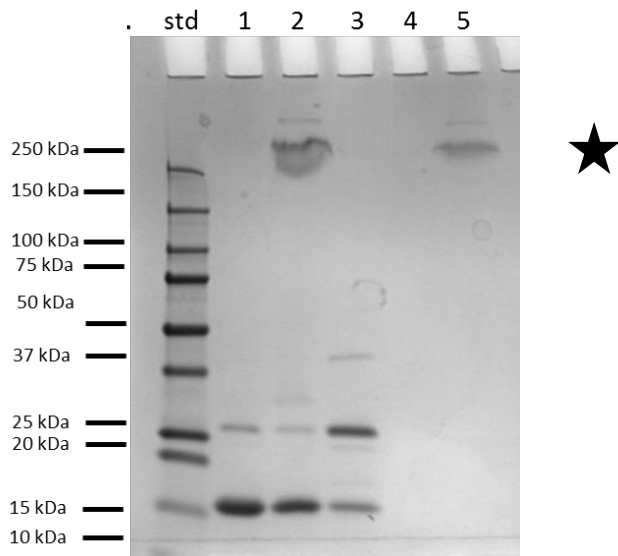

**b**

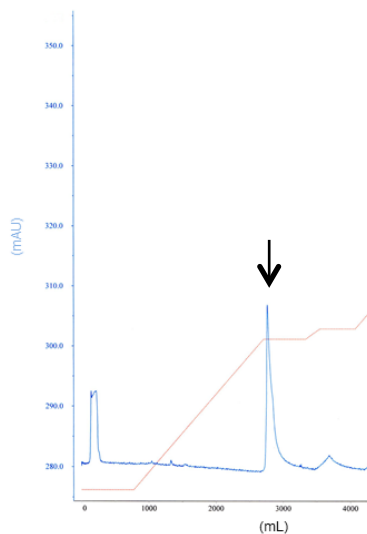

**Supplementary Figure 2. Electrophoretic analyses of 99-kDa HEP-G-CSF and strong anion exchange (SAX) chromatography purification of 55-kDa HEP-G-CSF.**

**Panel a** - Samples were separated in 4-20% TGX gradient gel and stained with Coomassie Blue. **std**, Precision Plus<sup>®</sup> protein size standard. **Lane 1**, free G-CSF. **Lane 2**, conjugation reaction mixture before purification. **Lane 3**, uncoupled protein in the flow-through of SAX. **Lane 4**, blank. **Lane 5**, purified HEP-G-CSF conjugate (marked with a *star*).

**Panel b** - SAX profile of the 55-kDa-HEP-G-CSF purification depicted in Fig. 2 of main text. The peak marked with the *arrow* was pooled and used for animal efficacy testing (*blue*, UV absorbance at 215 nm; *orange*, NaCl gradient).

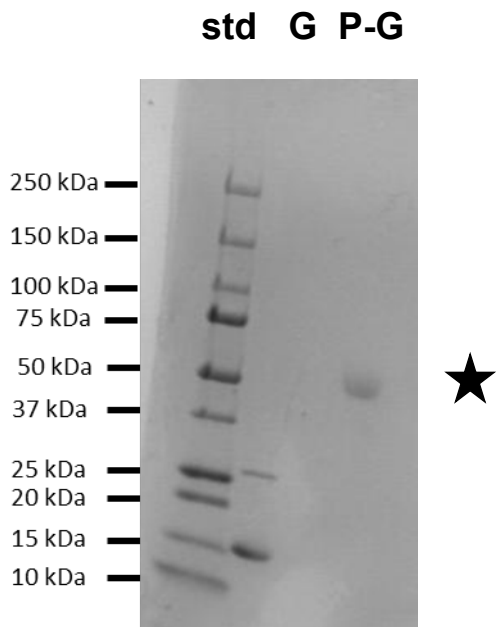

**Supplementary Fig 3. SDS-PAGE analysis of purified PEG-G-CSF.**

The starting protein and the in-house prepared, cation exchange chromatography-purified PEG-conjugate were analyzed on 4-20% TGX gel with Coomassie Blue staining. **Lanes: G**, G-CSF; **P-G**, PEG-G-CSF (*star*); **std**, Precision Plus<sup>®</sup> protein standard.

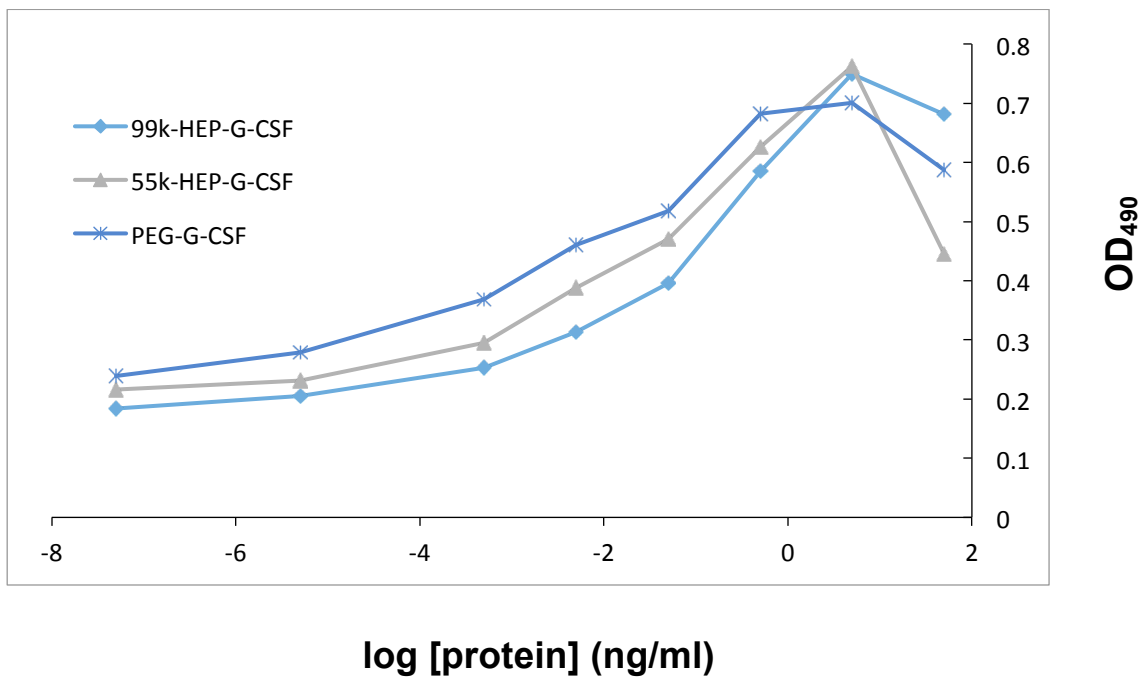

**Supplementary Fig 4. NFS-60 cell proliferation assay of 55-kDa and 99-kDa HEP-G-CSF and PEG-G-CSF.**

All 3 conjugates stimulated proliferation in culture. The approximate effective concentration for 50% effect ( $EC_{50}$ ) values (pg/ml) were: PEG-G-CSF, 4.1; 55-kDa HEP, 20; 99-kDa HEP, 25.

## Intensity

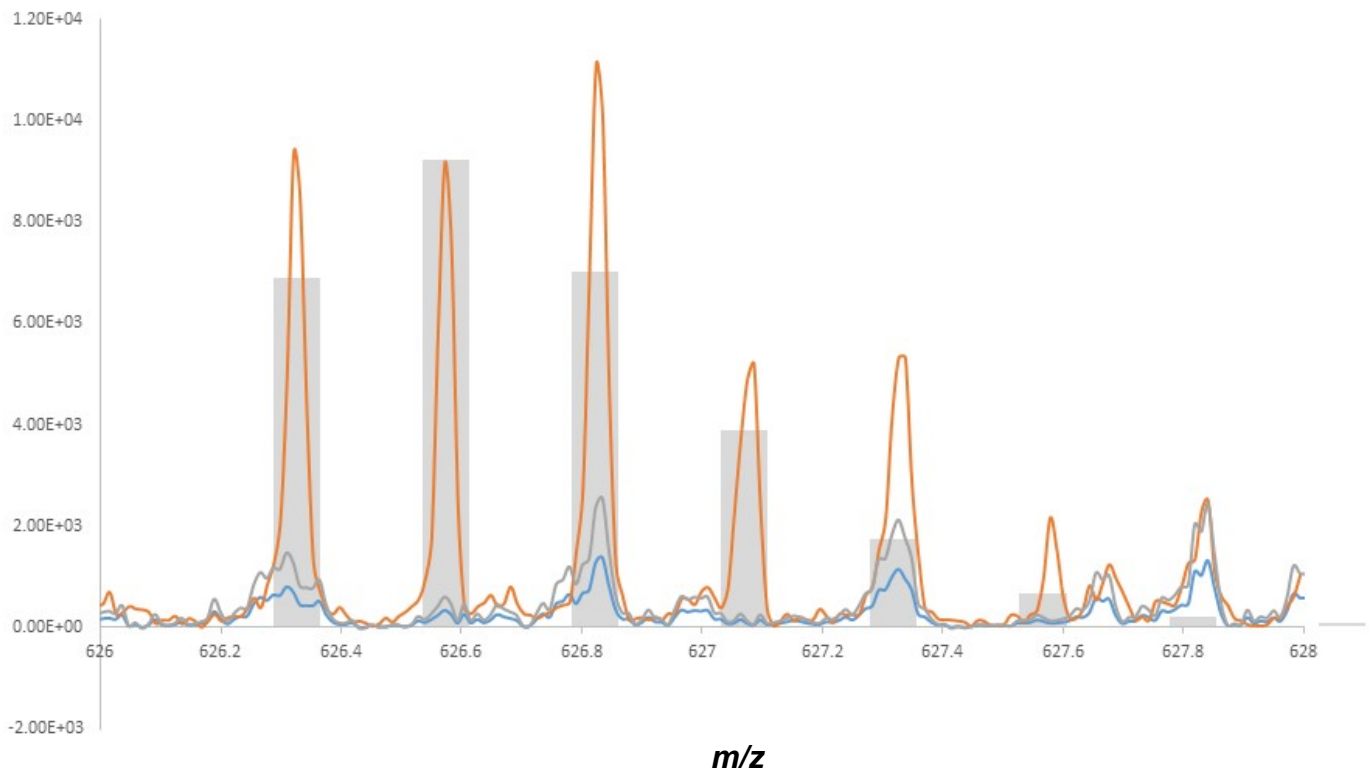

### Supplementary Figure 5. LC-MS-MS analysis of trisaccharide-peptide 'stub' of HEP-G-CSF conjugate.

The 55-kDa HEP modified G-CSF (*orange*) or unmodified protein (*blue*; *grey* normalized to HEP-G-CSF intensity for other peptide species) were analyzed in parallel by peptide mapping. A unique +4-charged species (composed of MTPLGPASSLPQSFLK:  $C_{82}H_{136}N_{19}O_{23}S_1$  and Hep3-linker:  $C_{30}H_{40}N_2O_{18}$  forming the complex:  $C_{112}H_{174}N_{21}O_{41}S_1$ ; standard formula weight: 2502.761; see Supp. Fig. 1, structure **D**) was observed confirming coupling of the heparosan chain to the amino-terminus of the protein drug.



**Supp. Fig 6. Molecular simulation data for hydrodynamic radius predictions of HEP-G-CSF conjugates.**

The data below for the 20-kDa, 55-kDa, or 99-kDa HEP-G-CSF was used to generate the values in **Table I**; the *green trace* reflects the average  $r_h$  over time (cumulative moving average). Note that the longer sugar chains displayed a wider range of possible configurations and consequently the same number of computations resulted in a less accurate average  $r_h$  prediction.

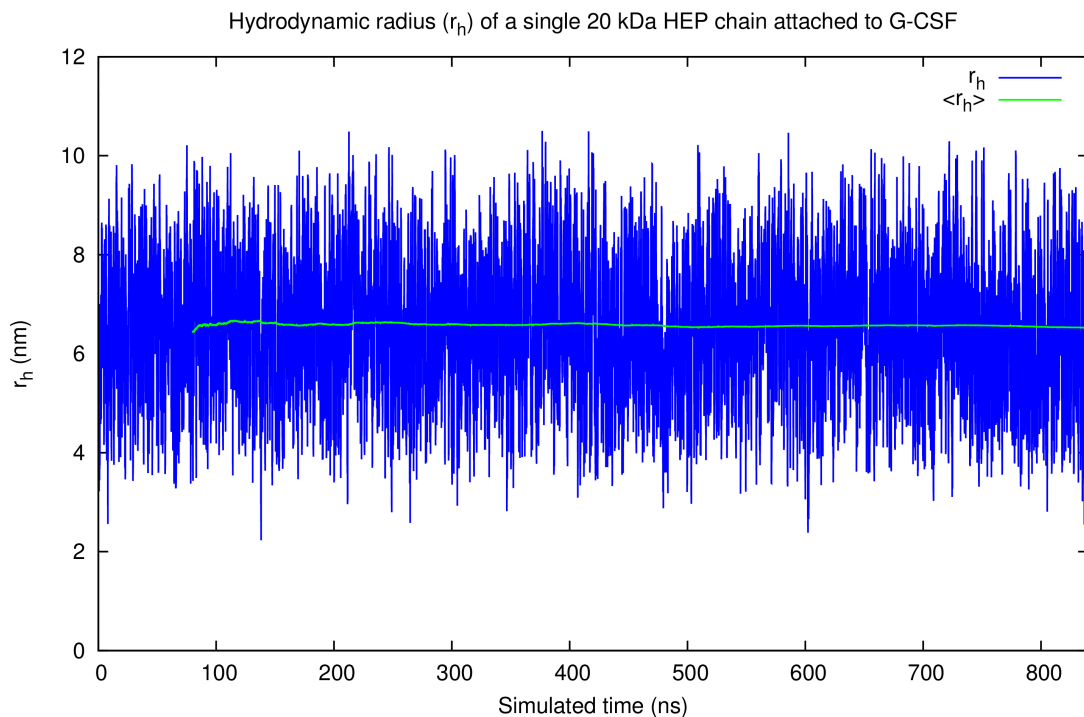

20-kDa HEP-G-CSF

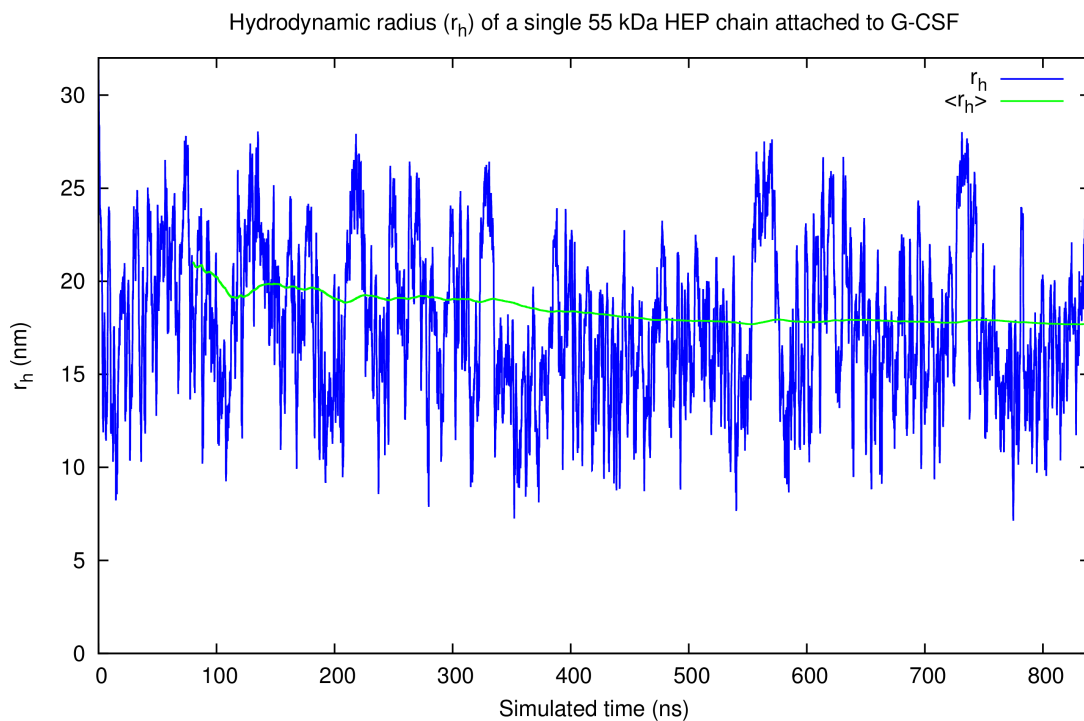

55-kDa HEP-G-CSF

**Supp. Fig 6. Molecular simulation data for hydrodynamic radius predictions of HEP-G-CSF conjugates. (cont.)**

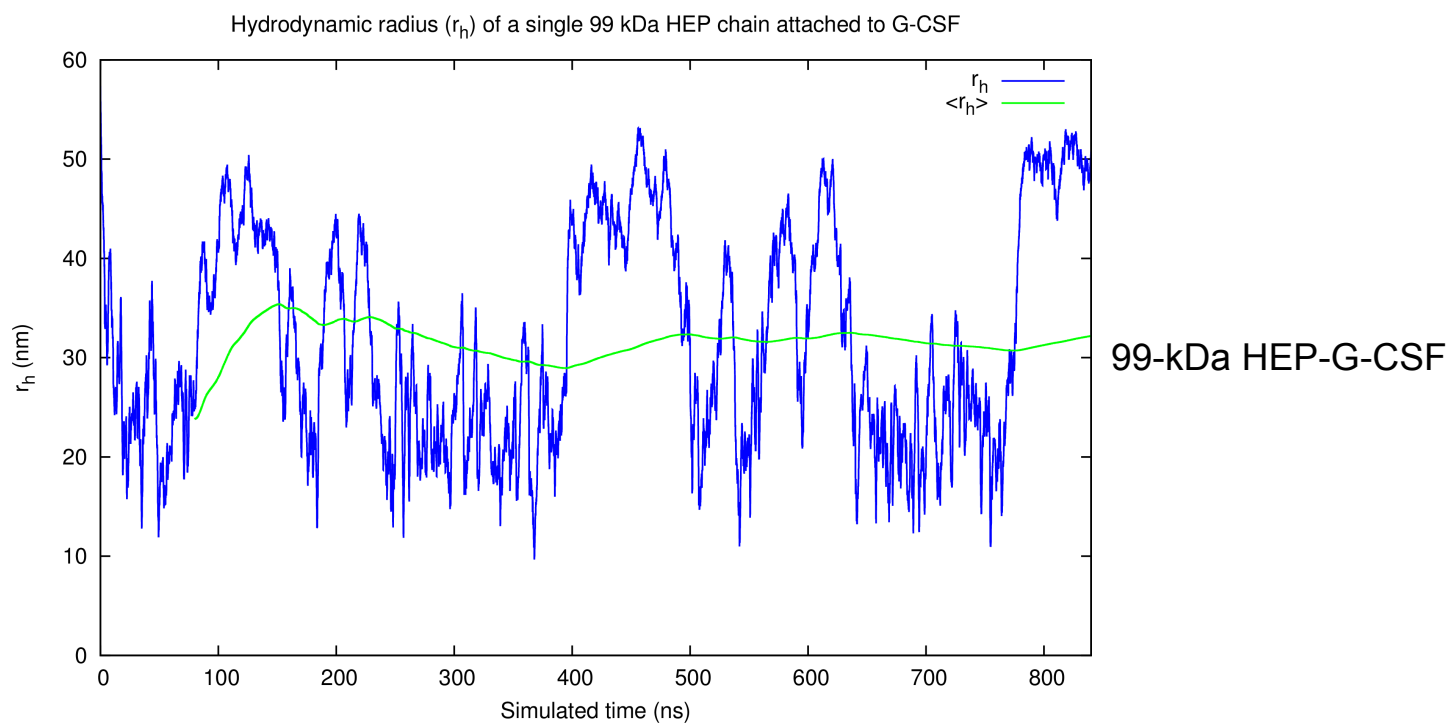

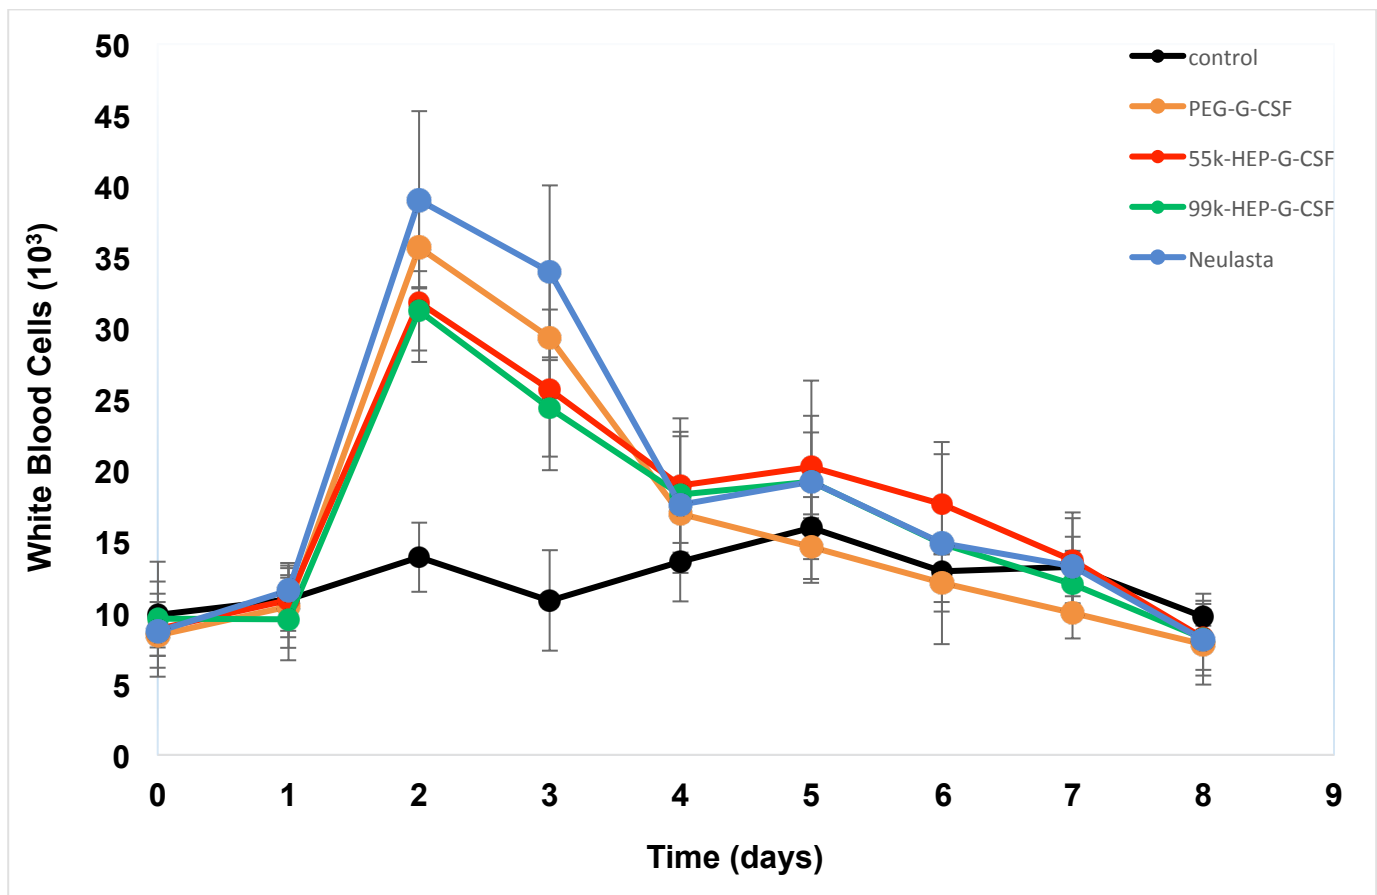

**Supplementary Figure 7. Hematology study with single injection of HEP-G-CSF (55- or 99-kDa), PEG-G-CSF (in-house prepared), or Neulasta<sup>®</sup> in healthy rats.**

The absolute white blood cell counts were stimulated by all conjugates in comparison to the vehicle control (*black*).

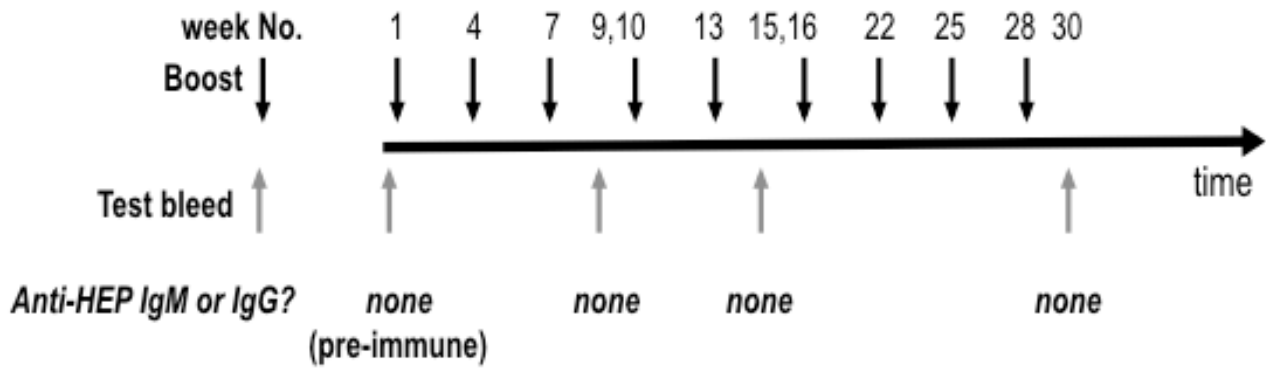

**Supplementary Figure 8. Immunization and bleeding schedule of the long-term immunological study in three Sprague Dawley rats.**

The rats were boosted with 55-kDa HEP-G-CSF antigen nine times approximately every three weeks. *Arrows* indicate the time of antigen boost (*black*) and bleed collection (*gray*). Each rat received 55-kDa HEP-G-CSF about every three weeks at 0.4-0.7 mg/kg. Serum were collected before the first injection (week zero = 'prebleed') and at week 9, 15 and 27 (rat #3) or at week 9, 15 and 30 (rat #1, and #2) (post-injection bleed 1, 2, and 3). To detect potential anti-heparosan antibodies, enzyme-linked immunosorbent assay (ELISA) plates were coated with HEP-BSA (a conjugate with bovine serum albumin). As a negative control, some wells were treated with BSA only. The presence of any potential anti-HEP-G-CSF antibodies was analyzed by ELISA with goat anti-rat IgG or IgM as the secondary antibodies (as horseradish peroxidase conjugates; see Fig. 5 for results).
